# Supplementary material for: Overheidsmaatregelen om overgewicht tegen te gaan
Source: Springer Nature journal article supplement (doi:10.1007/s12508-021-00314-x), 2021-08-01
Supplement: MOESM1 [file 19544216]

**Supplement S.1 Vijf stellingen om acceptatie van overheidsingrijpen te meten**

| 1. De overheid moet zich niet bemoeien met de leefstijl van mensen. |
| --- |
| 2. Als gedrag de gezondheid van andere mensen kan schaden, moet de overheid ingrijpen. |
| 3. De overheid is verantwoordelijk voor de gezondheid van de bevolking. |
| 4. Mensen met een gezonde leefstijl moeten voorrang krijgen als ze zorg nodig hebben ten opzichte van mensen met een ongezonde leefstijl. |
| 5. Leefstijl is een eigen keuze, en de gevolgen zijn daarom voor eigen verantwoordelijkheid. |
