# Supplementary material for: Overheidsmaatregelen om overgewicht tegen te gaan
Source: Springer Nature journal article supplement (doi:10.1007/s12508-021-00314-x), 2021-08-01
Supplement: MOESM2 [file 19544216]

**Supplement S.2 Beschrijving van de onderzoekspopulatie (n = 698)**

| Achtergrondkenmerken | | **%** |
| --- | --- | --- |
| Leeftijd | 18-35 | 23,4 |
|  | 36-50 | 26,1 |
|  | 51-70 | 50,5 |
| Geslacht | Vrouw | 52,0 |
|  | Man | 48,0 |
| Opleidingsniveau1 | Laag | 16,9 |
|  | Midden | 53,0 |
|  | Hoog | 30,1 |
| BMI, gemiddelde (standaarddeviatie) |  | 26,3 (6,0) |
| Gewicht2 | Geen overgewicht | 47,1 |
|  | Overgewicht | 52,9 |

1 Laag: basisschool, vmbo (beroepsgericht)/mbo-1, vmbo (theoretisch/gemengd)/mavo; midden: mbo-2, -3, -4/mbo voor 1998, havo/vwo; hoog: propedeuse hbo/wo, bachelor hbo/wo, master hbo/wo, postdoctoraal 2 Geen overgewicht: BMI < 25,0; overgewicht: BMI ≥ 25,0
