# Supplementary material for: Overheidsmaatregelen om overgewicht tegen te gaan
Source: Springer Nature journal article supplement (doi:10.1007/s12508-021-00314-x), 2021-08-01
Supplement: MOESM4 [file 19544216]

**Supplement S.4 Mogelijke overheidsmaatregelen rond gezond gewicht en percentage dat gelooft in de effectiviteit voor respondent zelf versus anderen, voor mensen met overgewicht (n = 368)**

**
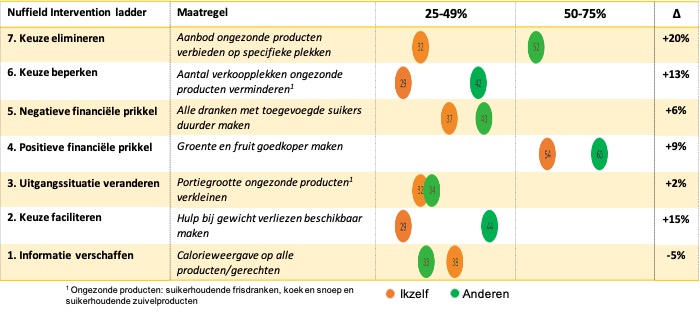
**
