# Supplementary figures and images for: Overheidsmaatregelen om overgewicht tegen te gaan
Source: Springer Nature journal article supplement (doi:10.1007/s12508-021-00314-x), 2021-08-01

**Supplement S.3 Acceptatie van overheidsingrijpen op het gebied van leefstijl (n = 698)**


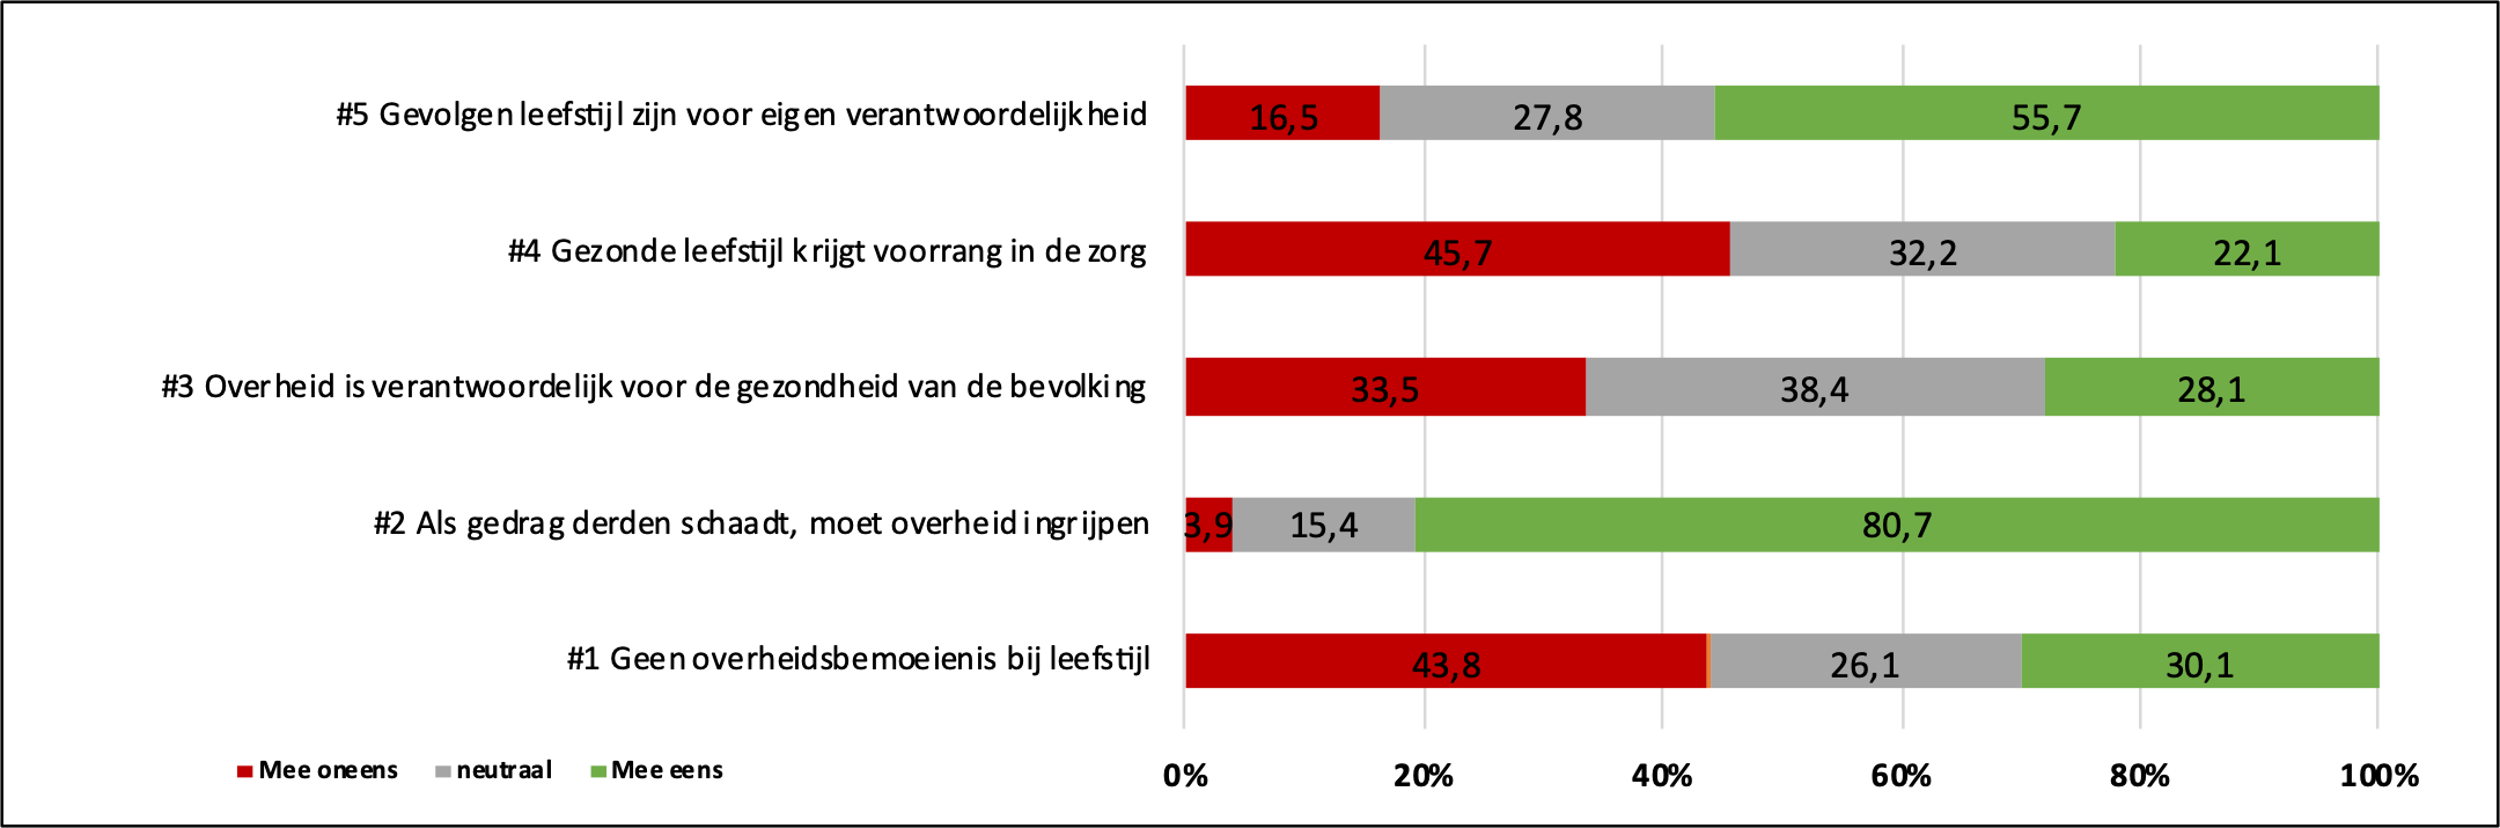

Supplement: MOESM3 [file 19544216]
